# Supplementary material for: Effects of Low Temperature, Nitrogen Starvation and Their Combination on the Photosynthesis and Metabolites of Thermosynechococcus E542: A Comparison Study
Source: MDPI journal article supplement (doi:10.3390/plants10102101), 2021-10-04
Supplement: s1 [file s1]

**Table S1** Profiles of polar lipids in in thermophilic cyanobacterium *Thermosynechococcus* E542

| Lipid Species   | Formula                                         | Observed Mass | Calculated Mass |
|-----------------|-------------------------------------------------|---------------|-----------------|
| (Fatty acids)   |                                                 |               |                 |
|                 | [M+CH <sub>3</sub> COO] <sup>-</sup>            |               |                 |
| MGDG(16:0/18:1) | C <sub>45</sub> H <sub>83</sub> O <sub>12</sub> | 815.5905      | 815.5890        |
| MGDG(16:0/16:1) | C <sub>43</sub> H <sub>79</sub> O <sub>12</sub> | 787.5583      | 787.5577        |
| MGDG(16:0/16:0) | C <sub>43</sub> H <sub>81</sub> O <sub>12</sub> | 789.5727      | 789.5734        |
| MGDG(16:0/19:1) | C <sub>46</sub> H <sub>85</sub> O <sub>12</sub> | 829.6058      | 829.6047        |
| MGDG(17:0/18:1) | C <sub>46</sub> H <sub>85</sub> O <sub>12</sub> | 829.6054      | 829.6047        |
| MGDG(16:0/17:1) | C <sub>44</sub> H <sub>81</sub> O <sub>12</sub> | 801.5746      | 801.5734        |
| MGDG(16:0/18:0) | C <sub>45</sub> H <sub>85</sub> O <sub>12</sub> | 817.6045      | 817.6047        |
| MGDG(16:1/18:1) | C <sub>45</sub> H <sub>81</sub> O <sub>12</sub> | 813.5742      | 813.5734        |
| MGDG(18:0/18:1) | C <sub>47</sub> H <sub>87</sub> O <sub>12</sub> | 843.6211      | 843.6203        |
| MGDG(16:0/17:0) | C <sub>44</sub> H <sub>83</sub> O <sub>12</sub> | 803.5903      | 803.5890        |
| MGDG(14:0/16:1) | C <sub>41</sub> H <sub>75</sub> O <sub>12</sub> | 759.5273      | 759.5264        |
| MGDG(14:1/16:0) | C <sub>41</sub> H <sub>75</sub> O <sub>12</sub> | 759.5264      | 759.5264        |
| MGDG(18:1/18:1) | C <sub>47</sub> H <sub>85</sub> O <sub>12</sub> | 841.6049      | 841.6047        |
| MGDG(14:0/16:0) | C <sub>41</sub> H <sub>77</sub> O <sub>12</sub> | 761.5427      | 761.5421        |
| MGDG(16:1/16:1) | C <sub>43</sub> H <sub>77</sub> O <sub>12</sub> | 785.5427      | 785.5421        |
| MGDG(16:1/19:1) | C <sub>46</sub> H <sub>83</sub> O <sub>12</sub> | 827.5899      | 827.5890        |
| MGDG(16:0/20:0) | C <sub>47</sub> H <sub>89</sub> O <sub>12</sub> | 845.6377      | 845.6360        |
| MGDG(16:1/17:1) | C <sub>44</sub> H <sub>79</sub> O <sub>12</sub> | 799.5590      | 799.5577        |
| MGDG(16:0/18:2) | C <sub>45</sub> H <sub>81</sub> O <sub>12</sub> | 813.5745      | 813.5734        |
| MGDG(12:0/16:0) | C <sub>39</sub> H <sub>73</sub> O <sub>12</sub> | 733.5108      | 733.5108        |
| MGDG(16:0/19:0) | C <sub>46</sub> H <sub>87</sub> O <sub>12</sub> | 831.6220      | 831.6203        |
| MGDG(18:0/19:1) | C <sub>48</sub> H <sub>89</sub> O <sub>12</sub> | 857.6384      | 857.6360        |
| MGDG(18:1/19:1) | C <sub>48</sub> H <sub>87</sub> O <sub>12</sub> | 855.6200      | 855.6203        |
| MGDG(15:0/16:1) | C <sub>42</sub> H <sub>77</sub> O <sub>12</sub> | 773.5404      | 773.5421        |

|                                      |                                                                |           |           |
|--------------------------------------|----------------------------------------------------------------|-----------|-----------|
| <b>MGDG(14:0/17:1)</b>               | C <sub>42</sub> H <sub>77</sub> O <sub>12</sub>                | 773.5430  | 773.5421  |
| <b>MGDG(17:1/18:1)</b>               | C <sub>46</sub> H <sub>83</sub> O <sub>12</sub>                | 827.5923  | 827.5890  |
| <b>MGDG(17:1/19:1)</b>               | C <sub>47</sub> H <sub>85</sub> O <sub>12</sub>                | 841.6069  | 841.6047  |
| <b>MGDG(12:0/16:1)</b>               | C <sub>39</sub> H <sub>71</sub> O <sub>12</sub>                | 731.4958  | 731.4951  |
| <b>MGDG(16:0/16:2)</b>               | C <sub>43</sub> H <sub>77</sub> O <sub>12</sub>                | 785.5433  | 785.5421  |
| [M+CH <sub>3</sub> COO] <sup>-</sup> |                                                                |           |           |
| <b>DGDG(16:0/18:1)</b>               | C <sub>51</sub> H <sub>93</sub> O <sub>17</sub>                | 977.6424  | 977.6418  |
| <b>DGDG(16:0/16:1)</b>               | C <sub>49</sub> H <sub>89</sub> O <sub>17</sub>                | 949.6112  | 949.6105  |
| <b>DGDG(16:0/16:0)</b>               | C <sub>49</sub> H <sub>91</sub> O <sub>17</sub>                | 951.6271  | 951.6262  |
| <b>DGDG(16:0/19:1)</b>               | C <sub>52</sub> H <sub>95</sub> O <sub>17</sub>                | 991.6585  | 991.6575  |
| <b>DGDG(17:0/18:1)</b>               | C <sub>52</sub> H <sub>95</sub> O <sub>17</sub>                | 991.6587  | 991.6575  |
| <b>DGDG(16:0/17:1)</b>               | C <sub>50</sub> H <sub>91</sub> O <sub>17</sub>                | 963.6274  | 963.6262  |
| <b>DGDG(16:0/18:0)</b>               | C <sub>51</sub> H <sub>95</sub> O <sub>17</sub>                | 979.6575  | 979.6575  |
| <b>DGDG(16:1/18:1)</b>               | C <sub>51</sub> H <sub>91</sub> O <sub>17</sub>                | 975.6263  | 975.6262  |
| <b>DGDG(14:0/16:0)</b>               | C <sub>47</sub> H <sub>87</sub> O <sub>17</sub>                | 923.5964  | 923.5949  |
| <b>DGDG(16:0/17:0)</b>               | C <sub>50</sub> H <sub>93</sub> O <sub>17</sub>                | 965.6440  | 965.6418  |
| <b>DGDG(18:1/18:1)</b>               | C <sub>53</sub> H <sub>95</sub> O <sub>17</sub>                | 1003.6593 | 1003.6575 |
| <b>DGDG(18:0/18:1)</b>               | C <sub>53</sub> H <sub>97</sub> O <sub>17</sub>                | 1005.6746 | 1005.6731 |
| <b>DGDG(16:1/19:1)</b>               | C <sub>52</sub> H <sub>93</sub> O <sub>17</sub>                | 989.6419  | 989.6418  |
| <b>DGDG(17:1/18:1)</b>               | C <sub>52</sub> H <sub>93</sub> O <sub>17</sub>                | 989.6436  | 989.6418  |
| <b>DGDG(16:1/16:1)</b>               | C <sub>49</sub> H <sub>87</sub> O <sub>17</sub>                | 947.5948  | 947.5949  |
| <b>DGDG(14:0/16:1)</b>               | C <sub>47</sub> H <sub>85</sub> O <sub>17</sub>                | 921.5808  | 921.5792  |
| <b>DGDG(14:1/16:0)</b>               | C <sub>47</sub> H <sub>85</sub> O <sub>17</sub>                | 921.5807  | 921.5792  |
| <b>DGDG(16:0/18:2)</b>               | C <sub>51</sub> H <sub>91</sub> O <sub>17</sub>                | 975.6266  | 975.6262  |
| <b>DGDG(16:1/17:1)</b>               | C <sub>50</sub> H <sub>89</sub> O <sub>17</sub>                | 961.6113  | 961.6105  |
| <b>DGDG(12:0/16:0)</b>               | C <sub>45</sub> H <sub>83</sub> O <sub>17</sub>                | 895.5645  | 895.5636  |
| [M-H] <sup>-</sup>                   |                                                                |           |           |
| <b>SQDG(16:0/16:0)</b>               | C <sub>41</sub> H <sub>77</sub> O <sub>12</sub> S <sub>1</sub> | 793.5141  | 793.5141  |
| <b>SQDG(16:1/16:1)</b>               | C <sub>41</sub> H <sub>73</sub> O <sub>12</sub> S <sub>1</sub> | 789.4842  | 789.4828  |

[illegible]
